# Supplementary material for: Identification of ovarian cancer subtype-specific network modules and candidate drivers through an integrative genomics approach
Source: PubMed Central journal article supplement (PMC4826206; doi:10.18632/oncotarget.6774), 2015-12-28
Supplement: oncotarget-07-4298-s001.pdf [file oncotarget-07-4298-s001.pdf]

## Identification of ovarian cancer subtype-specific network modules and candidate drivers through an integrative genomics approach

### Supplementary Materials

Supplementary Table S1: 8 modules identified in ovarian cancer subtype 1 network

| Module label | Number of genes | Genes                                                                                                                                                                                                                                                         |
|--------------|-----------------|---------------------------------------------------------------------------------------------------------------------------------------------------------------------------------------------------------------------------------------------------------------|
| RHOA         | 16              | RHPN1(1) RHPN2(1) SNTB1(1) RHOA*(10) DNM2(1) PLD1(2) DGKQ(1) PKN1(3) MAPK12(2) PTK2(3) IL27RA(1) MAPK11(1) TYK2(2) S1PR2(1) PTP4A3(1) PIK3CA(4)                                                                                                               |
| SMARCA4      | 11              | DNAJB1(1) FGFR3(1) RPL8(2) HSF1(2) CTBP1(2) CCNE1(1) MYC(3) ACTL6A(2) EEF1D(2) PARP10(1) SMARCA4(3)                                                                                                                                                           |
| NDRG1        | 11              | AKAP8L(1) GAK(1) TUBGCP6(1) AP1M2(3) ILF3(1) SLC2A2(1) AP2M1(2) PRKACA(5) NDRG1(6) PSMD2(1) LDLR(1)                                                                                                                                                           |
| DLST         | 23              | ATP5O*(18) ATP5D*(18) ATP5H*(18) ATP5L*(18) IDH3G*(11) NDUFB5(19) ATP5G1*(18) NDUFB9(19) IDH3B*(11) ATP5J*(18) DLST*(13) ATP5B*(18) CYC1(19) ATP5F1*(18) IDH3A*(11) CYP11B2(16) MCCC1(15) ATP5A1*(18) UQCERS1(19) ATP5E*(18) NDUFB7(19) CYP11B1(16) ATP5I(18) |
| POLR2H       | 3               | CPSF1(1) POLR2H(2) WHSC2(1)                                                                                                                                                                                                                                   |
| ABCF3        | 2               | ABCF3(1) SLC35E1(1)                                                                                                                                                                                                                                           |
| LY6H         | 3               | LY6H(2) DVL3(1) PPP1R16A(1)                                                                                                                                                                                                                                   |
| ZHX1         | 2               | ZHX1(2) ZHX2(1)                                                                                                                                                                                                                                               |

\*Linker gene is not altered in ovarian cancer, but is statistically enriched for connections to ovarian cancer altered genes. The number in brackets is the degree of gene.

**Supplementary Table S2: 14 modules identified in ovarian cancer subtype 2 network**

| Module label | Number of genes | Genes                                                                                                                                             |
|--------------|-----------------|---------------------------------------------------------------------------------------------------------------------------------------------------|
| PDX1         | 3               | SLC2A2(1) MAFA(1) PDX1(2)                                                                                                                         |
| ZHX1         | 2               | ZHX2(1) ZHX1(2)                                                                                                                                   |
| DLST         | 14              | IDH3B*(12) CYC1(10) MCCC1(5) IDH3A*(12) CYP11B2(6) COX6C(8) NDUFB5(9) CYP11B1(6) NDUFB9(9) UQCRFS1(10) ATP5A1*(10) IDH3G*(12) DLST*(15) UQCRB(10) |
| RB1          | 5               | MYC(3) ACTL6A(1) RB1(2) PARP10(1) CCNE1(1)                                                                                                        |
| EEF1D        | 3               | EEF1D(2) RPL8(2) RPL30(2)                                                                                                                         |
| CPSF1        | 5               | NFKBIB(1) HNRNPL(3) CPSF1(3) POLR2K(3) POLR2H(4)                                                                                                  |
| MAPK12       | 4               | DLG2(2) SNTB1(1) MAPK12(2) FZD4(1)                                                                                                                |
| PRSS23       | 4               | PRSS23(3) FXR1(1) RECQL4(1) MAPK8IP2(1)                                                                                                           |
| TNFSF10      | 2               | TNFSF10(1) TNFRSF11B(1)                                                                                                                           |
| NDRG1        | 8               | EIF3H(4) PABPC1(5) AP2M1(1) EIF3K(4) PSMD2(1) EIF4G1(4) EIF3E(4) NDRG1(4)                                                                         |
| PIK3CA       | 5               | SDC2(1) MAPK11(1) PTK2(1) PIK3CA(4) ANGPT1(1)                                                                                                     |
| LY6H         | 3               | DVL3(1) PPP1R16A(1) LY6H(2)                                                                                                                       |
| POP1         | 2               | POP4(1) POP1(1)                                                                                                                                   |
| YWHAZ        | 4               | KCNK9(1) PAK4(2) YWHAZ(4) PRKCI(1)                                                                                                                |

\*Linker gene is not altered in ovarian cancer, but is statistically enriched for connections to ovarian cancer altered genes. The number in brackets is the degree of gene.

**Supplementary Table S3: Pathways associated with ovarian cancer subtype****(A) Subtype 1**

| Annotation source | Term                                | Count | Raw <i>P</i> -value | Benjamini-Hochberg adjusted <i>P</i> -value |
|-------------------|-------------------------------------|-------|---------------------|---------------------------------------------|
| PANTHER_PATHWAY   | P00005:Angiogenesis                 | 8     | 0.000349139         | 0.01902272                                  |
| PANTHER_PATHWAY   | P04398:p53 pathway feedback loops 2 | 5     | 0.000610762         | 0.016660739                                 |
| PANTHER_PATHWAY   | P04393:Ras Pathway                  | 5     | 0.002483911         | 0.044571194                                 |

Note: Count represents the number of annotated genes in each pathway term.

**(B) Subtype 2**

| Annotation source | Term                                | Count | Raw <i>P</i> -value | Benjamini-Hochberg adjusted <i>P</i> -value |
|-------------------|-------------------------------------|-------|---------------------|---------------------------------------------|
| PANTHER_PATHWAY   | P04398:p53 pathway feedback loops 2 | 6     | 0.0000376           | 0.002068051                                 |
| PANTHER_PATHWAY   | P00005:Angiogenesis                 | 8     | 0.000349            | 0.009557028                                 |
| PANTHER_PATHWAY   | P00056:VEGF signaling pathway       | 5     | 0.001459193         | 0.026416224                                 |
| PANTHER_PATHWAY   | P00010:B cell activation            | 5     | 0.002010594         | 0.02729409                                  |

Note: Count represents the number of annotated genes in each pathway term.
